# Supplementary material
Source: Springer Nature journal article supplement (https://www.springermedizin.de/resource/supplementary/13012_2013_692_MOESM5_ESM.pdf/9630254)
Supplement: MOESM5 [file 9630254]

Search of bibliographic  
databases (n = 135)

Excluded on title/abstract  
(n = 116)  
Duplicates (96)

Full text guidelines obtained  
for screening (n = 19)

Excluded (n= 6)  
Ineligible (6)

Full text guidelines obtained  
for data extraction  
(n = 19)

Google free text searches  
(n = 6)
